# Supplementary material
Source: MDPI journal article supplement (https://www.mdpi.com/2073-445X/10/1/46)
Supplement: s1 [file s1]

**17/12/2020**

**Supporting Information**

**1) Appendix S1**

**PART A -Land-use and livelihoods**

1. What has been the percent cover of the following prevalent land uses in Mara?

| Land use type                             | 1960s | 1970s | 1980s | 1990s | 2000s | 2010s |
|-------------------------------------------|-------|-------|-------|-------|-------|-------|
| Livestock grazing                         |       |       |       |       |       |       |
| Agriculture                               |       |       |       |       |       |       |
| Conservation                              |       |       |       |       |       |       |
| Forest                                    |       |       |       |       |       |       |
| Natural features<br>(Swamps,rivers)       |       |       |       |       |       |       |
| Settlements                               |       |       |       |       |       |       |
| Urban/built up<br>areas/social facilities |       |       |       |       |       |       |
| Fallow                                    |       |       |       |       |       |       |

2. What land use types are observed in the following land tenure systems?

| Land tenure type | Land use type |
|------------------|---------------|
| Communal land    |               |
| Private land     |               |
| Trust land       |               |

3. What land makes good land for the following land uses and how is it allocated?

| Land use type                             | Why is it ideal for the land use type? |
|-------------------------------------------|----------------------------------------|
| Livestock grazing                         |                                        |
| Agriculture                               |                                        |
| Conservation                              |                                        |
| Forest                                    |                                        |
| Natural features<br>(Swamps,rivers)       |                                        |
| Settlements                               |                                        |
| Urban/built up<br>areas/social facilities |                                        |
| Fallow                                    |                                        |

4. What percent of available communal land used by communities for farming is allocated for:

Subsistence food provision? -----

Income generation activities such as commercial farming-----

Livestock keeping? -----

## PART B: Changes in land use types

5. What are the main causes of land use change in Mara?
6. i) Was there a peak in land use change? Yes.....No.....  
ii) When was the peak?.....  
iii) What was the cause of the peak?.....
7. i) What are the main factors affecting livelihood patterns in Mara?  
ii) In what ways have climate change, availability of natural resources and human population growth affected livelihood patterns observed in Mara?

| Social or environmental situation                           | Livelihoods types practiced |         |
|-------------------------------------------------------------|-----------------------------|---------|
|                                                             | Males                       | Females |
| Increase in droughts                                        |                             |         |
| Increase in rainfall                                        |                             |         |
| Availability of natural resources<br>e.g. wildlife, forests |                             |         |
| Human population increase                                   |                             |         |
| Increase in education levels                                |                             |         |
| Increase in infrastructure and<br>built-up areas            |                             |         |
| Increase in land subdivision                                |                             |         |
| Increase in community based<br>natural resource management  |                             |         |

- iii) Do these patterns vary according to literacy levels or income levels?

| Social or environmental situation                           | Livelihoods practiced/Livelihood pattern |                                 |
|-------------------------------------------------------------|------------------------------------------|---------------------------------|
|                                                             | Primary education                        | Secondary or tertiary education |
| Increase in droughts                                        |                                          |                                 |
| Increase in rainfall                                        |                                          |                                 |
| Availability of natural resources<br>e.g. wildlife, forests |                                          |                                 |
| Human population increase                                   |                                          |                                 |
| Per capita decrease in livestock                            |                                          |                                 |
| Increase in infrastructure and<br>built-up areas            |                                          |                                 |
| Increase in land subdivision                                |                                          |                                 |
| Increase in community based<br>natural resource management  |                                          |                                 |

- iv) Are there any seasonal, monthly or yearly variations in livelihood patterns?

8. Were there major climatic, cultural or economic events in the history of Mara that changed people's livelihoods? What coping strategies were used?

| Historical events that changed people's livelihood | Livelihood changes that occurred | Coping strategy used |
|----------------------------------------------------|----------------------------------|----------------------|
| Climatic event(s)                                  |                                  |                      |
| Cultural events                                    |                                  |                      |
| Economic events                                    |                                  |                      |
| Government policy                                  |                                  |                      |
| Other                                              |                                  |                      |

9. What local organizations/public programmes have the greatest influence on the choice of livelihood patterns?

10. Which natural resource is most important for income generation/accessing adequate food?

11. i) What is the percent prevalence of pastoralism compared to other livelihoods in Mara after Kenya's independence in 1963?

High 65-100%)? -----

Medium (30-65%)? -----

Low (0-30%)? -----

- ii) What makes pastoralists change to other livelihoods? Rank the reasons below from highest to lowest with 1 and 7 being the least and most important reasons for change respectively.

| Reason of changing from pastoralism to other livelihoods      | Rank |
|---------------------------------------------------------------|------|
| Droughts                                                      |      |
| Human population growth and socio economic development        |      |
| Land subdivision and fear of losing land                      |      |
| Little income from pastoralism                                |      |
| Government policy                                             |      |
| Livestock competition for pasture and water with wild animals |      |
| Livestock competition for pasture and water with agriculture  |      |
| Other                                                         |      |

- ii) What livelihood types do pastoralists prefer to adapt to?

#### Part D: Land management

12. What drivers of land use change can be addressed through better management of land/natural resources, policy intervention and community institutions?

| Driver of land use change | Intervention                   |                                               |                                     |                   |
|---------------------------|--------------------------------|-----------------------------------------------|-------------------------------------|-------------------|
|                           | Better management of resources | Community benefiting from available resources | Formation of community institutions | Government policy |
| i)                        |                                |                                               |                                     |                   |
| ii)                       |                                |                                               |                                     |                   |
| iii)                      |                                |                                               |                                     |                   |
| iv)                       |                                |                                               |                                     |                   |

13. What are the main causes of land subdivision in Mara?

14. Is land rotation system for farming and livestock practised in Mara?

Yes -----

No -----

15. i) Is there enough land for all?

Yes -----, why-----

No -----, why-----

ii) What currently happens in cases of land scarcity?

iii) What currently happens in cases of human migration?

**Table S1: Adjusted Residual for Chi-square test of association between land tenure and land use type.**

|                      | <b>Adjusted Residual</b> |             |                       |             |                   |
|----------------------|--------------------------|-------------|-----------------------|-------------|-------------------|
|                      | Livestock grazing        | Agriculture | Wildlife conservation | Settlements | Social facilities |
| Communal land tenure | 1.1                      | -0.4        | 1.1                   | -2.9        | 3.3               |
| Private land tenure  | -1.1                     | 0.4         | -1.1                  | 2.9         | -3.3              |

**Table S2: Adjusted Residual for Chi-square test of association between study area and land use type.**

|              | <b>Adjusted Residual</b> |             |                       |             |                   |
|--------------|--------------------------|-------------|-----------------------|-------------|-------------------|
|              | Livestock grazing        | Agriculture | Wildlife conservation | Settlements | Social facilities |
| Amboseli     | -1                       | 1.1         | -1.2                  | -2          | 0.1               |
| Mara         | -1                       | -4.4        | 2.1                   | 1           | 2.3               |
| Loita Plains | 0.2                      | 2.9         | -7                    | -0.7        | -2.2              |
